# Supplementary material
Source: PubMed Central journal article supplement (PMC7446075)
Supplement: jcsm.8494.ds001.pdf [file jcsm.8494.ds001.pdf]

Table S1 Linear regression of the associations between weekend catch-up sleep and EFs classified by age.

| Executive Function        | Age (years) | No catch-up | 0~1 hour             | 1~2 hours                 | >2 hours                   | <i>p</i> <sub>inter</sub> |
|---------------------------|-------------|-------------|----------------------|---------------------------|----------------------------|---------------------------|
| n (%)                     | 6~9         | 775 (27.0%) | 1337 (46.6%)         | 568 (19.8%)               | 189 (6.6%)                 | -                         |
|                           | 10~12       | 473 (25.8%) | 760 (41.5%)          | 418 (22.8%)               | 179 (9.8%)                 |                           |
| Inhibit                   | 6~9         | Ref         | 0.18 (-0.52, 0.88)   | 0.40 (-0.46, 1.27)        | 1.02 (-0.30, 2.35)         | 0.345                     |
|                           | 10~12       | Ref         | -0.50 (-1.36, 0.36)  | <b>1.10 (0.09, 2.10)*</b> | 0.80 (-0.53, 2.14)         |                           |
| Shift                     | 6~9         | Ref         | -0.34 (-1.05, 0.36)  | -0.36 (-1.23, 0.51)       | 1.33 (-0.00, 2.66)         | 0.800                     |
|                           | 10~12       | Ref         | 0.07 (-0.83, 0.98)   | 0.59 (-0.48, 1.65)        | <b>2.25 (0.84, 3.65)**</b> |                           |
| Emotional Control         | 6~9         | Ref         | 0.15 (-0.53, 0.83)   | 0.67 (-0.17, 1.50)        | <b>1.31 (0.03, 2.60)*</b>  | 0.480                     |
|                           | 10~12       | Ref         | -0.62 (-1.48, 0.23)  | 0.38 (-0.62, 1.39)        | <b>1.41 (0.08, 2.74)*</b>  |                           |
| Initiate                  | 6~9         | Ref         | 0.53 (-0.29, 1.35)   | 0.42 (-0.59, 1.43)        | 1.04 (-0.51, 2.60)         | 0.653                     |
|                           | 10~12       | Ref         | -0.43 (-1.46, 0.60)  | 0.54 (-0.67, 1.75)        | <b>2.86 (1.26, 4.46)**</b> |                           |
| Working Memory            | 6~9         | Ref         | 0.27 (-0.57, 1.12)   | 0.05 (-0.99, 1.09)        | 0.37 (-1.23, 1.97)         | 0.980                     |
|                           | 10~12       | Ref         | -1.35 (-2.39, -0.32) | 0.12 (-1.10, 1.33)        | <b>2.10 (0.49, 3.71)*</b>  |                           |
| Plan/Organize             | 6~9         | Ref         | -0.26 (-1.18, 0.66)  | 0.44 (-0.69, 1.58)        | 0.65 (-1.09, 2.39)         | 0.282                     |
|                           | 10~12       | Ref         | -0.95 (-2.06, 0.16)  | 0.63 (-0.67, 1.93)        | <b>2.52 (0.79, 4.24)**</b> |                           |
| Organization of Materials | 6~9         | Ref         | -0.48 (-1.25, 0.28)  | -0.13 (-1.07, 0.81)       | -0.10 (-1.54, 1.33)        | 0.222                     |
|                           | 10~12       | Ref         | -0.57 (-1.51, 0.37)  | -0.12 (-1.22, 0.98)       | <b>1.61 (0.15, 3.07)*</b>  |                           |
| Monitor                   | 6~9         | Ref         | 0.02 (-0.98, 1.02)   | 0.21 (-1.02, 1.45)        | 1.13 (-0.76, 3.03)         | 0.371                     |
|                           | 10~12       | Ref         | -1.29 (-2.53, -0.05) | 0.27 (-1.18, 1.72)        | <b>2.46 (0.53, 4.38)*</b>  |                           |
| BRI                       | 6~9         | Ref         | 0.08 (-0.59, 0.76)   | 0.39 (-0.44, 1.23)        | <b>1.39 (0.11, 2.67)*</b>  | 0.409                     |
|                           | 10~12       | Ref         | -0.45 (-1.30, 0.40)  | 0.83 (-0.17, 1.83)        | <b>1.66 (0.34, 2.99)*</b>  |                           |
| MI                        | 6~9         | Ref         | 0.02 (-0.87, 0.91)   | 0.24 (-0.86, 1.34)        | 0.72 (-0.97, 2.41)         | 0.338                     |
|                           | 10~12       | Ref         | -1.06 (-2.15, 0.03)  | 0.37 (-0.91, 1.65)        | <b>2.67 (0.97, 4.37)**</b> |                           |

|             |       |     |                     |                    |                            |       |
|-------------|-------|-----|---------------------|--------------------|----------------------------|-------|
| GEC(BRI+MI) | 6~9   | Ref | 0.03 (-0.77, 0.83)  | 0.30 (-0.68, 1.29) | 1.04 (-0.47, 2.56)         | 0.322 |
|             | 10~12 | Ref | -0.95 (-1.96, 0.05) | 0.50 (-0.68, 1.68) | <b>2.39 (0.82, 3.95)**</b> |       |

Adjusted for gender, paternal and maternal educational level, family income, MSFsc, Nap, MVPA, SB, BMI, weekday sleep duration.

MSFsc: midpoint of sleep on free days corrected for sleep extension on free days. MVPA: moderate to vigorous physical activity. SB: sedentary behavior. BMI: body mass index, kg/m<sup>2</sup>. BRI: Behavioral Regulation Index. MI: Metacognition Index. GEC: Global Executive Composite.

$p < 0.05$  depicted with \*.  $p < 0.01$  depicted with \*\*.

Table S2 Linear regression of the associations between weekend catch-up sleep and EFs classified by gender.

| Executive Function        | Gender | No catch-up | 0~1 hour            | 1~2 hours           | >2 hours                   | <i>p</i> <sub>inter</sub> |
|---------------------------|--------|-------------|---------------------|---------------------|----------------------------|---------------------------|
| n (%)                     | Boy    | 713 (28.7%) | 1126 (45.3%)        | 492 (19.8%)         | 157 (6.3%)                 | -                         |
|                           | Girl   | 535 (24.2%) | 971 (43.9%)         | 494 (22.3%)         | 211 (9.5%)                 |                           |
| Inhibit                   | Boy    | Ref         | -0.15 (-0.93, 0.63) | 0.66 (-0.30, 1.63)  | <b>1.91 (0.42, 3.40)*</b>  | 0.366                     |
|                           | Girl   | Ref         | 0.02 (-0.74, 0.77)  | 0.69 (-0.20, 1.58)  | 0.23 (-0.97, 1.43)         |                           |
| Shift                     | Boy    | Ref         | -0.14 (-0.90, 0.61) | -0.10 (-1.03, 0.83) | <b>2.07 (0.63, 3.52)**</b> | 0.677                     |
|                           | Girl   | Ref         | -0.21 (-1.03, 0.62) | 0.01 (-0.96, 0.98)  | <b>1.41 (0.10, 2.71)*</b>  |                           |
| Emotional Control         | Boy    | Ref         | -0.19 (-0.93, 0.55) | 0.32 (-0.60, 1.23)  | 1.34 (-0.08, 2.76)         | 0.673                     |
|                           | Girl   | Ref         | -0.05 (-0.81, 0.71) | 0.72 (-0.18, 1.61)  | <b>1.42 (0.21, 2.62)*</b>  |                           |
| Initiate                  | Boy    | Ref         | 0.11 (-0.73, 0.94)  | 0.33 (-0.69, 1.36)  | <b>1.96 (0.37, 3.55)*</b>  | 0.882                     |
|                           | Girl   | Ref         | 0.32 (-0.68, 1.32)  | 0.57 (-0.61, 1.75)  | <b>1.96 (0.37, 3.55)*</b>  |                           |
| Working Memory            | Boy    | Ref         | -0.37 (-1.25, 0.51) | 0.07 (-1.02, 1.16)  | <b>2.07 (0.38, 3.76)*</b>  | 0.582                     |
|                           | Girl   | Ref         | -0.23 (-1.21, 0.76) | 0.09 (-1.07, 1.25)  | 0.72 (-0.84, 2.29)         |                           |
| Plan/Organize             | Boy    | Ref         | -0.67 (-1.63, 0.29) | 0.26 (-0.92, 1.45)  | <b>2.25 (0.42, 4.09)*</b>  | 0.499                     |
|                           | Girl   | Ref         | -0.32 (-1.39, 0.74) | 0.61 (-0.65, 1.86)  | 0.96 (-0.73, 2.66)         |                           |
| Organization of Materials | Boy    | Ref         | -0.80 (-1.63, 0.02) | -0.21 (-1.23, 0.81) | 1.27 (-0.31, 2.85)         | 0.884                     |
|                           | Girl   | Ref         | -0.11 (-0.96, 0.73) | 0.03 (-0.97, 1.03)  | 0.51 (-0.83, 1.86)         |                           |
| Monitor                   | Boy    | Ref         | -0.79 (-1.85, 0.27) | -0.43 (-1.74, 0.88) | <b>2.78 (0.75, 4.81)**</b> | 0.750                     |
|                           | Girl   | Ref         | -0.08 (-1.24, 1.08) | 0.78 (-0.59, 2.15)  | 1.14 (-0.70, 2.99)         |                           |
| BRI                       | Boy    | Ref         | -0.16 (-0.90, 0.58) | 0.43 (-0.49, 1.35)  | <b>2.05 (0.63, 3.47)**</b> | 0.666                     |
|                           | Girl   | Ref         | -0.05 (-0.80, 0.70) | 0.63 (-0.26, 1.52)  | 1.14 (-0.06, 2.33)         |                           |
| MI                        | Boy    | Ref         | -0.58 (-1.52, 0.35) | 0.05 (-1.10, 1.21)  | <b>2.54 (0.75, 4.33)**</b> | 0.597                     |
|                           | Girl   | Ref         | -0.10 (-1.13, 0.94) | 0.49 (-0.73, 1.70)  | 1.13 (-0.51, 2.78)         |                           |

|             |      |     |                     |                    |                            |       |
|-------------|------|-----|---------------------|--------------------|----------------------------|-------|
| GEC(BRI+MI) | Boy  | Ref | -0.49 (-1.35, 0.38) | 0.17 (-0.90, 1.24) | <b>2.50 (0.85, 4.16)**</b> | 0.606 |
|             | Girl | Ref | -0.12 (-1.03, 0.80) | 0.53 (-0.55, 1.60) | 1.18 (-0.27, 2.63)         |       |

Adjusted for age, paternal and maternal educational level, family income, MSFsc, Nap, MVPA, SB, BMI, weekday sleep duration.

MSFsc: midpoint of sleep on free days corrected for sleep extension on free days. MVPA: moderate to vigorous physical activity. SB: sedentary behavior. BMI: body mass index, kg/m<sup>2</sup>. BRI: Behavioral Regulation Index. MI: Metacognition Index. GEC: Global Executive Composite.

$p < 0.05$  depicted with \*.  $p < 0.01$  depicted with \*\*.
